# Supplementary material for: FGFR1 activation is an escape mechanism in human lung cancer cells resistant to afatinib, a pan-EGFR family kinase inhibitor
Source: PubMed Central journal article supplement (PMC4171601; doi:10.18632/oncotarget.1866), 2014-03-26

# Fig supplement1

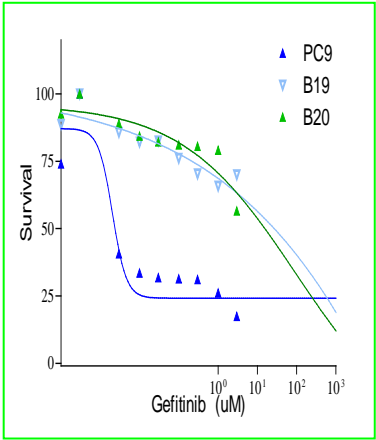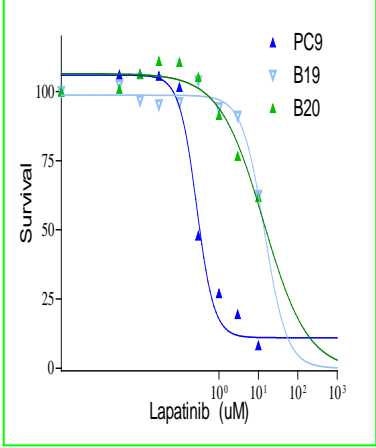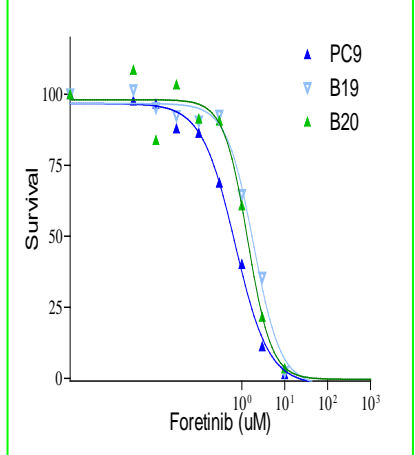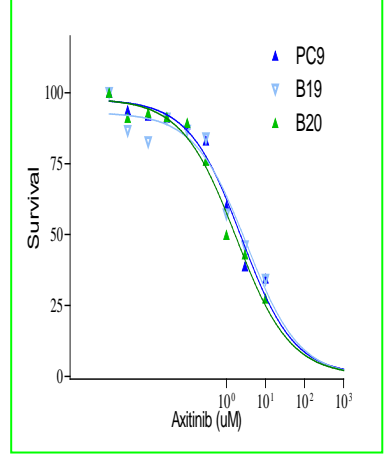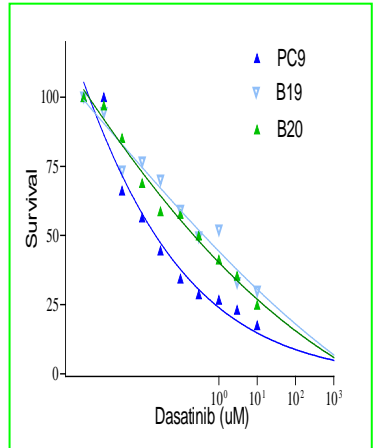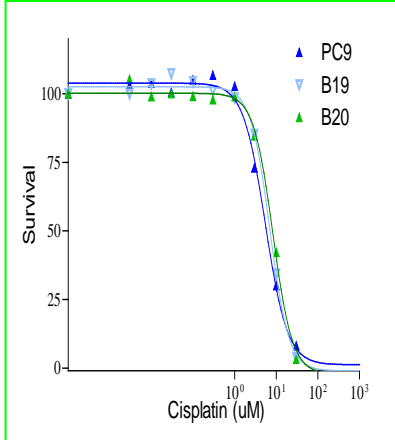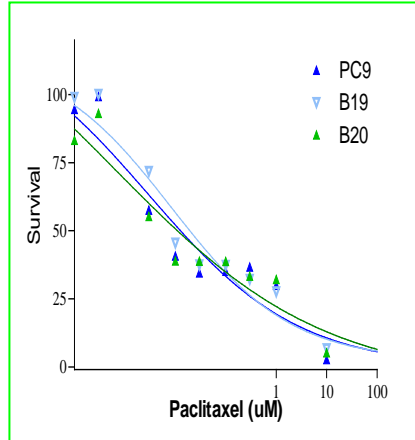

Supplement: oncotarget-05-5908-s002.pdf [file oncotarget-05-5908-s002.pdf]
